# Supplementary material for: Prediction of storm transfers and annual loads with data-based mechanistic models using high-frequency data
Source: Copernicus journal article supplement (doi:10.5194/hess-21-6425-2017), 2017-12-18
Supplement: Supplementary file 1 [file hess-21-6425-2017-supplement.pdf]

Supplement of Hydrol. Earth Syst. Sci., 21, 6425–6444, 2017  
<https://doi.org/10.5194/hess-21-6425-2017-supplement>  
© Author(s) 2017. This work is distributed under  
the Creative Commons Attribution 3.0 License.

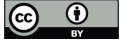

*Supplement of*

## **Prediction of storm transfers and annual loads with data-based mechanistic models using high-frequency data**

**Mary C. Ockenden et al.**

*Correspondence to:* Philip M. Haygarth (p.haygarth@lancaster.ac.uk)

The copyright of individual parts of the supplement might differ from the CC BY 3.0 License.

## Supplementary Information

Contents

Pages: 28

Sections: 2

Tables: 5

Figures: 18

References: 6

## Section S1

### Estimation of hourly rainfall time series for the Wylfe catchment

Rainfall data were obtained from the Demonstration Test Catchment (DTC) Programme and the Environment Agency (EA) as follows:

| Source | Site             | Easting (m) | Northing (m) | Data format                            |
|--------|------------------|-------------|--------------|----------------------------------------|
| DTC    | Brixton Deverill | 385600      | 137900       | Daily, 9am to 9am                      |
| DTC    | Norton Ferris    | 379000      | 136466       | Daily, 9am to 9am                      |
| EA     | Frome            | 377364      | 148748       | Raw tipping bucket times with QA flags |
| EA     | Gillingham       | 380310      | 125840       | Raw tipping bucket times with QA flags |
| EA     | Penridge         | 375350      | 131860       | Raw tipping bucket times with QA flags |
| EA     | Tisbury          | 395694      | 129843       | Raw tipping bucket times with QA flags |
| EA     | Walters Farm     | 372649      | 137298       | Raw tipping bucket times with QA flags |

The EA gauges were all outside the Wylfe catchment; locations are shown in Figure 1c (main manuscript). Only data flagged G (good) was used from tipping bucket data, analysed to give hourly time series. For periods where tips were not marked 'G', hourly time series were filled with NaN (not a number), to signify missing data rather than no rain. For the hourly time series, cross correlation between sites indicated that the sites with highest cross correlation were Gillingham, Penridge and Walters Farm (cross correlation 0.73 – 0.80, at zero time lag). Hourly datasets were aggregated to daily (9am to 9am) and regressed with the daily datasets from Brixton Deverill (catchment outlet) and Norton Ferris (in W of catchment) to assess total rainfall volume and how representative each one was of rainfall in the catchment. The datasets most closely aligned with Brixton Deverill and Norton Ferris were Gillingham, Penridge and Walters Farm ( $R^2$  between 0.79 and 0.90). As all the datasets had some missing data, a combined dataset taking the mean (discounting missing data) of sites Gillingham, Penridge and Walters Farm was used to create an hourly dataset from 1 January 2011 – 31 May 2014. This dataset was used for transfer function modelling.

## Section S2

### Model assessment criteria

Model fit was assessed according to  $R_t^2$  (akin to Nash Sutcliffe Efficiency):

$$R_t^2 = 1 - \frac{\hat{\sigma}^2}{\sigma_y^2}; \quad (S1)$$

$$\text{where } \hat{\sigma}^2 = \frac{1}{N} \sum_{i=1}^N [\hat{y}_i - y_i]^2; \quad \sigma_y^2 = \frac{1}{N} \sum_{i=1}^N [y_i - \bar{y}]^2; \quad \bar{y} = \frac{1}{N} \sum_{i=1}^N y_i \quad (S2)$$

$\hat{y}_i$  are the model estimations,  $y_i$  are the observations,  $\hat{\sigma}^2$  is the variance estimate of the model residuals (only equal if the mean of residuals is identically zero) and  $\sigma_y^2$  is the variance of the observations.

Systematic over- or under-prediction of the model was evaluated with model bias:

$$\text{Model bias} = 100 * \Sigma[\hat{y}_i - y_i] / \Sigma y_i \quad (S3)$$

A balance of model fit and over-parameterisation was sought using the Young Information Criterion (YIC) (Young, 1984) and visual inspection of the model fit to the monitoring data.

$$YIC = \log_e \frac{\hat{\sigma}^2}{\sigma_y^2} + \log_e \{NEVN\} \quad (S4)$$

where NEVN is the normalised error variance norm defined as:

$$NEVN = \frac{1}{np} \sum_{i=1}^{np} \frac{\hat{\sigma}^2 \hat{P}_{ii}}{\hat{a}_i^2} \quad (S5)$$

$np$  is the number of parameters estimated,  $\hat{P}_{ii}$  is the  $i$ th diagonal on the parameter covariance matrix,  $\hat{a}_i^2$  is the square of the  $i$ th parameter. The first term in YIC is based on the coefficient of determination and is a measure of how well the model explains the data (the smaller the model residuals, the more negative this term becomes). The second term is a measure of the over-parameterisation; generally, a higher order model will capture more of the dynamics of the system, but with higher uncertainty in the parameter estimates. In that case the second term in YIC will dominate. Thus YIC is a compromise between the fit of the model and model complexity.

Table S1 Study catchment characteristics

|                                                                 |                                                                                          |                                                                                                      |                                                                                                              |
|-----------------------------------------------------------------|------------------------------------------------------------------------------------------|------------------------------------------------------------------------------------------------------|--------------------------------------------------------------------------------------------------------------|
| Catchment                                                       | Newby Beck at Newby                                                                      | Blackwater at Park Farm                                                                              | Wylve at Brixton Deverill                                                                                    |
| Part of DTC catchment                                           | Eden, Cumbria                                                                            | Wensum, Norfolk                                                                                      | Avon, Hampshire                                                                                              |
| Sampling location at catchment outlet                           | 54.59° N, 2.62° W                                                                        | 52.78° N, 1.15° E                                                                                    | 51.16° N, 2.19° W                                                                                            |
| Elevation of sampling location (m a.s.l.)                       | 233                                                                                      | 43                                                                                                   | 189                                                                                                          |
| Size of catchment (km <sup>2</sup> )                            | 12.5                                                                                     | 19.7                                                                                                 | 50.2                                                                                                         |
| Aspect (° from North)                                           | 28°                                                                                      | 144°                                                                                                 | 106°                                                                                                         |
| Mean (and standard deviation) annual rainfall <sup>a</sup> (mm) | 1262 (220)                                                                               | 995 (142)                                                                                            | 714 (109)                                                                                                    |
| Baseflow index <sup>b</sup>                                     | 0.39                                                                                     | 0.80                                                                                                 | 0.93                                                                                                         |
| Soils <sup>c</sup>                                              | Clay loam and sandy clay loam soils; Brickfield 3, Waltham and Clifton soil associations | Chalky boulder clay and sandy loam soils; Beccles 1, Burlingham 1 and Wick 2 and 3 soil associations | Sandy loam and silty clay loam soils; Ardington, Blewbury, Coombe 1, Upton 1, and Icknield soil associations |
| Geology                                                         | Glacial till over Carboniferous limestone                                                | Quaternary glacial till, sands and gravels over Pleistocene Crag and Cretaceous Chalk                | Cretaceous Chalk and Upper Greensand                                                                         |
| Land use                                                        | Livestock                                                                                | Arable crops                                                                                         | Livestock and cereals                                                                                        |

<sup>a</sup> From UKCP Gridded Observation Data, 1981 – 2011 (Met Office, 2009)

<sup>b</sup> From Flood Estimation Handbook (Robson and Reed, 1999)

<sup>c</sup> From Soil Survey of England and Wales (Soil Survey of England and Wales, 1983)

Table S2 Notation

|                  |                                                                                                                                             |
|------------------|---------------------------------------------------------------------------------------------------------------------------------------------|
| $a_f, a_s$       | Parameters in the denominator polynomials of the partial fraction expansion into parallel, first order transfer functions (see SI Table S3) |
| $b_f, b_s$       | Parameters in the numerator polynomials of the partial fraction expansion into parallel, first order transfer functions (see SI Table S3)   |
| $\beta$          | A constant exponent in the rainfall non-linearity (see Eq. 4)                                                                               |
| $\delta$         | Pure time delay in a discrete-time model (see SI Table S3, Eq. S6 and S7)                                                                   |
| $m$              | Order of the numerator polynomial                                                                                                           |
| $n$              | Order of the denominator polynomial                                                                                                         |
| NSE              | Nash Sutcliffe Efficiency (see also $R_t^2$ )                                                                                               |
| $Q(t)$           | Discharge at time $t$                                                                                                                       |
| $R(t)$           | Rainfall at time $t$                                                                                                                        |
| $Re(t)$          | Effective rainfall at time $t$                                                                                                              |
| $R_t^2$          | Model fit = 1 – variance estimate of model residuals/variance of observations                                                               |
| $\sigma_y^2$     | Variance of observations = $\frac{1}{N} \sum_{i=1}^N [y_i - \bar{y}]^2$                                                                     |
| $\hat{\sigma}^2$ | Variance estimate of model residuals = $\frac{1}{N} \sum_{i=1}^N [\hat{y}_i - y_i]^2$                                                       |
| TPload(t)        | Total phosphorus load during time step ending at time $t$                                                                                   |
| $\tau$           | Time delay in a continuous-time model (see SI Table S3, Eq. S8 and S9)                                                                      |
| $y_i$            | Observation at $i$ th time step                                                                                                             |
| $\bar{y}$        | Mean of observations = $\frac{1}{N} \sum_{i=1}^N y_i$                                                                                       |
| $\hat{y}_i$      | Model prediction at $i$ th time step                                                                                                        |
| YIC              | Young Information Criterion (see SI Section S2, Eq. S4)                                                                                     |

Table S3 Structure of models and relationship between parameters from discrete-time and continuous-time models (from Ockenden et al., 2017)

**Structure: Discrete time**

A second-order discrete linear transfer function with no noise model, denoted by [2, 2,  $\delta$ ] takes the form:

$$y(t) = \frac{b_1 + b_2 z^{-1}}{1 + a_1 z^{-1} + a_2 z^{-2}} u(t - \delta) \quad (S6)$$

where  $y(t)$  is model output at time  $t$ ,  $u(t)$  is model input,  $z^{-1}$  is the backwards step operator i.e.  $z^{-1}y(t) = y(t-1)$ .  $b_1, b_2, a_1, a_2$  are parameters determined during model identification and  $\delta$  is the number of time steps of pure time delay. For a physical interpretation, models are only accepted if they can be decomposed by partial fraction expansion into two first order transfer functions with structure [1, 1,  $\delta$ ] representing fast and slow pathways, with characteristic time constants and steady state gains, i.e.

$$y(t) = \frac{b_f}{1 - a_f z^{-1}} u(t - \delta) + \frac{b_s}{1 - a_s z^{-1}} u(t - \delta) \quad (S7)$$

where  $b_f$  and  $b_s$  are gains on the fast and slow pathways, respectively, and  $a_f$  and  $a_s$  are parameters characterising the time constants of the fast and slow pathways respectively.  $a_f$  and  $a_s$  are roots of the denominator polynomial in the second order transfer functions above (Eq. S6).

**Structure: Continuous-time**

A second order continuous-time linear transfer function with no noise model takes the form:

$$Y(s) = \frac{b_1 s + b_2}{s^2 + a_1 s + a_2} e^{-s\tau} U(s) \quad (S8)$$

where,  $Y(s)$  and  $U(s)$  represent the Laplace transforms of the output and input, respectively.  $b_1, b_2, a_1, a_2$  are parameters in the denominator and numerator polynomials in the derivative operator  $s = \frac{d}{dt}$  that define the relationship between the input and the output, and  $\tau$  represents the delay. Models are only accepted if they can be decomposed by partial fraction expansion into two parallel, first-order transfer functions i.e.

$$Y = \frac{b_f}{s + a_f} e^{-s\tau} U + \frac{b_s}{s + a_s} e^{-s\tau} U \quad (S9)$$

where  $a_f$  and  $a_s$  are direct reciprocals of the fast and slow time constants respectively, which define the fast and slow components of the response.  $b_f$  and  $b_s$  are parameters which determine the gain of the fast and slow components, respectively.

### Relationship between parameters for discrete-time and continuous-time models

Parameters  $b_1, b_2, a_1, a_2$  (and parameters  $b_f, b_s, a_f, a_s$ ) have different interpretation, and therefore different values between discrete-time and continuous-time models. The relationship between the parameters (see most Control Engineering textbooks, (e.g. Franklin et al., 2002) between discrete model denoted by superscript d and continuous time model denoted by superscript c is as follows:

for instance, for denominator parameter  $a_f$

$$a_f^d = e^{-a_f^c \Delta t} \quad (\text{S10})$$

while for  $b_f$  we have:

$$b_f^d = \frac{b_f^c}{a_f^c} (1 - e^{-a_f^c \Delta t}) \quad (\text{S11})$$



Table S4 Definition of time constants, steady state gains and fraction on each pathway for discrete-time and continuous-time models, e.g. for second order model, following partial fraction decomposition according to SI Eq. S7 (discrete-time) or SI Eq. S9 (continuous-time)

|                             | Discrete-time                                                       | Continuous-time                                             |
|-----------------------------|---------------------------------------------------------------------|-------------------------------------------------------------|
| Time constants (fast, slow) | $\frac{\Delta T}{-\log_e(a_f^d)} ; \frac{\Delta T}{-\log_e(a_s^d)}$ | $\frac{1}{a_f^c} ; \frac{1}{a_f^c}$                         |
| Steady state gains          | $SSG_1 = \frac{b_f^d}{1-a_f^d} ; SSG_2 = \frac{b_s^d}{1-a_s^d}$     | $SSG_1 = \frac{b_f^c}{a_f^c} ; SSG_2 = \frac{b_f^c}{a_f^c}$ |
| Fraction on each pathway    | $\frac{SSG_1}{SSG_1+SSG_2} ; \frac{SSG_2}{SSG_1+SSG_2}$             | $\frac{SSG_1}{SSG_1+SSG_2} ; \frac{SSG_2}{SSG_1+SSG_2}$     |

Table S5

Model structure and parameters identified, including uncertainty from 10,000 Monte Carlo realisations (from Ockenden et al., 2017)

| Model structures and parameters for DBM models used in simulations |                    |                            |                         |         |                      |                       |                     |                       |
|--------------------------------------------------------------------|--------------------|----------------------------|-------------------------|---------|----------------------|-----------------------|---------------------|-----------------------|
| Site                                                               | Model output       | Model input                | Model structure         | $\beta$ | a1                   | a2                    | b1                  | b2                    |
| Newby, Eden                                                        | Discharge<br>Q     | Effective<br>Rainfall Re*  | Continuous<br>[2, 2, 1] | 0.37    | $0.3474 \pm 0.0064$  | $0.0023 \pm 0.0001$   | $0.1646 \pm 0.0026$ | $0.0026 \pm 0.0001$   |
| Newby, Eden                                                        | Total P load<br>TP | Effective<br>rainfall Re** | Continuous<br>[1, 1, 1] |         | $0.6429 \pm 0.0191$  |                       | $2.0086 \pm 0.0562$ |                       |
| Blackwater,<br>Wensum                                              | Discharge<br>Q     | Effective<br>Rainfall Re*  | Discrete<br>[2, 2, 6]   | 0.65    | $-1.9324 \pm 0.0021$ | $0.9325 \pm 0.0021$   | $0.0526 \pm 0.0012$ | $-0.0521 \pm 0.0012$  |
| Blackwater,<br>Wensum                                              | Total P load<br>TP | Rainfall R                 | Continuous<br>[2, 2, 4] |         | $0.0826 \pm 0.0018$  | $0.00021 \pm 0.00003$ | $0.0335 \pm 0.0012$ | $0.00016 \pm 0.00002$ |
| Wylye, Avon                                                        | Discharge<br>Q     | Effective<br>Rainfall Re*  | Discrete<br>[2, 2, 6]   | 0.59    | $-1.7785 \pm 0.0109$ | $0.7790 \pm 0.0108$   | $0.0440 \pm 0.0016$ | $-0.0428 \pm 0.0015$  |
| Wylye, Avon                                                        | Total P load<br>TP | Effective<br>rainfall Re** | Continuous<br>[2, 2, 6] |         | $0.1660 \pm 0.0080$  | $0.00029 \pm 0.00003$ | $1.3015 \pm 0.0506$ | $0.0054 \pm 0.0006$   |

\*where effective rainfall is used as input to the linear DBM discharge model, this is estimated at the same time as the model parameters, using rainfall R as input

\*\*where effective rainfall is used as input to the linear DBM TPload model, this is first calculated using the previously estimated parameters for the discharge model

Figure S1

Hourly streamflow (Q) against total phosphorus (TP) concentration for the Newby Beck catchment, with the rising limb of storm hydrographs in blue and the falling limb of hydrographs in red.

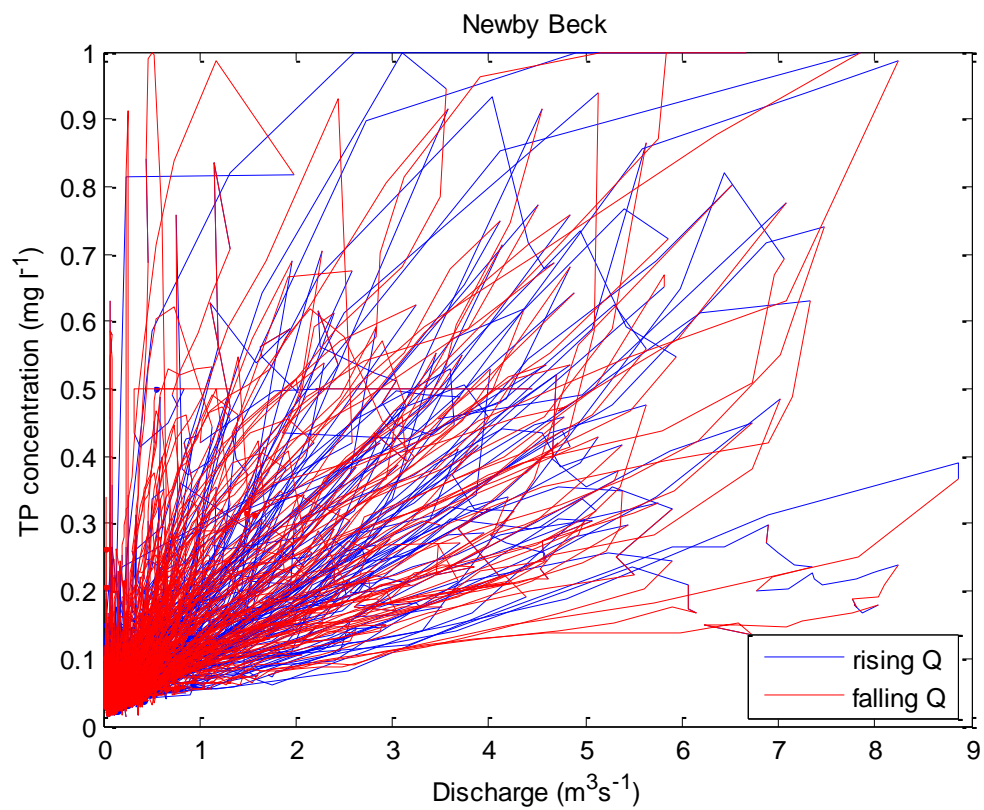

Figure S2

Hourly streamflow (Q) against total phosphorus (TP) concentration for the Blackwater catchment, with the rising limb of storm hydrographs in blue and the falling limb of hydrographs in red.

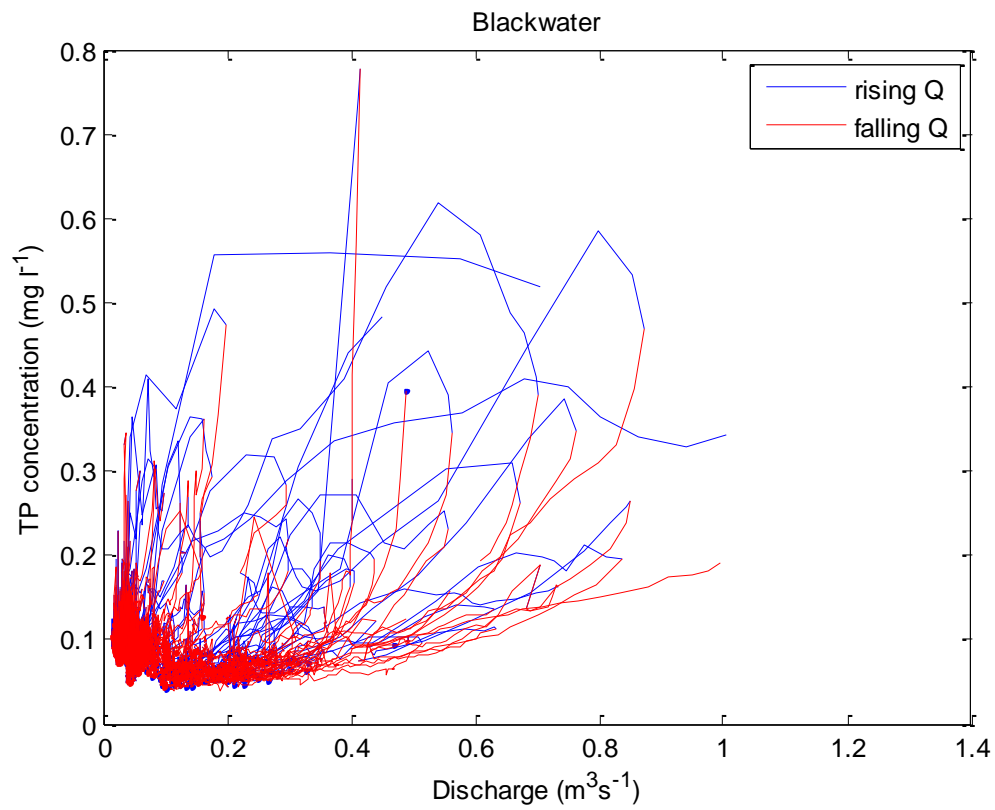

Figure S3

Hourly streamflow (Q) against total phosphorus (TP) concentration for the Wylie catchment, with the rising limb of storm hydrographs in blue and the falling limb of hydrographs in red.

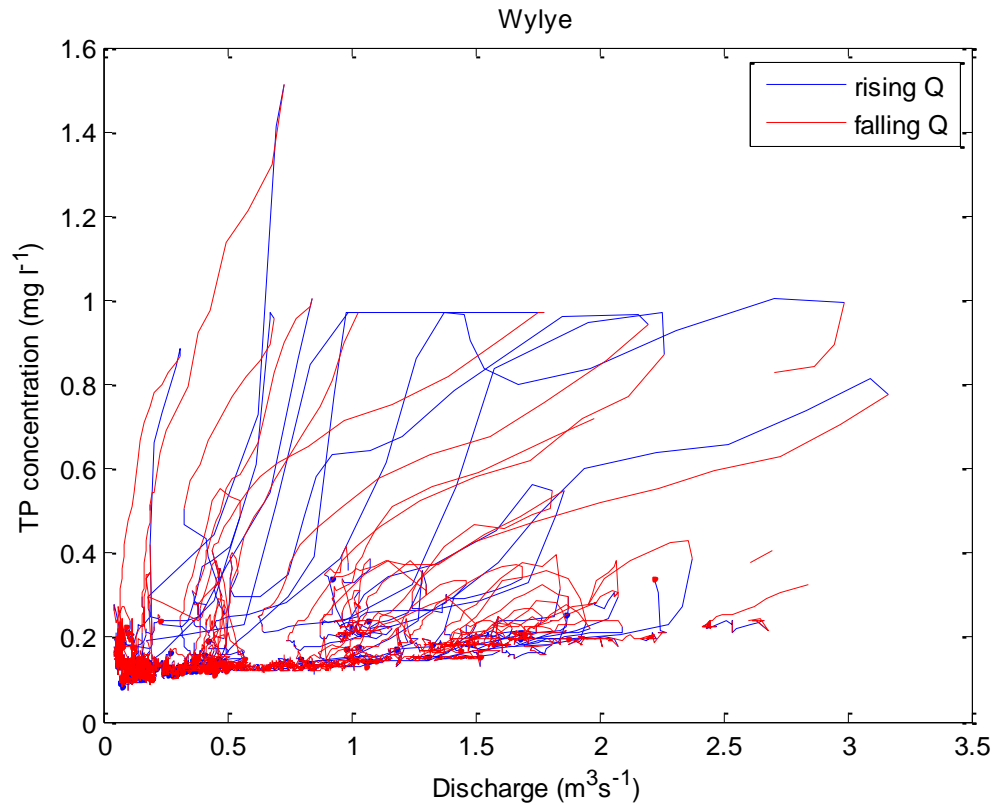

Figure S4

Hourly streamflow (Q) against total phosphorus (TP) load for the Newby Beck catchment, with the rising limb of storm hydrographs in blue and the falling limb of hydrographs in red.

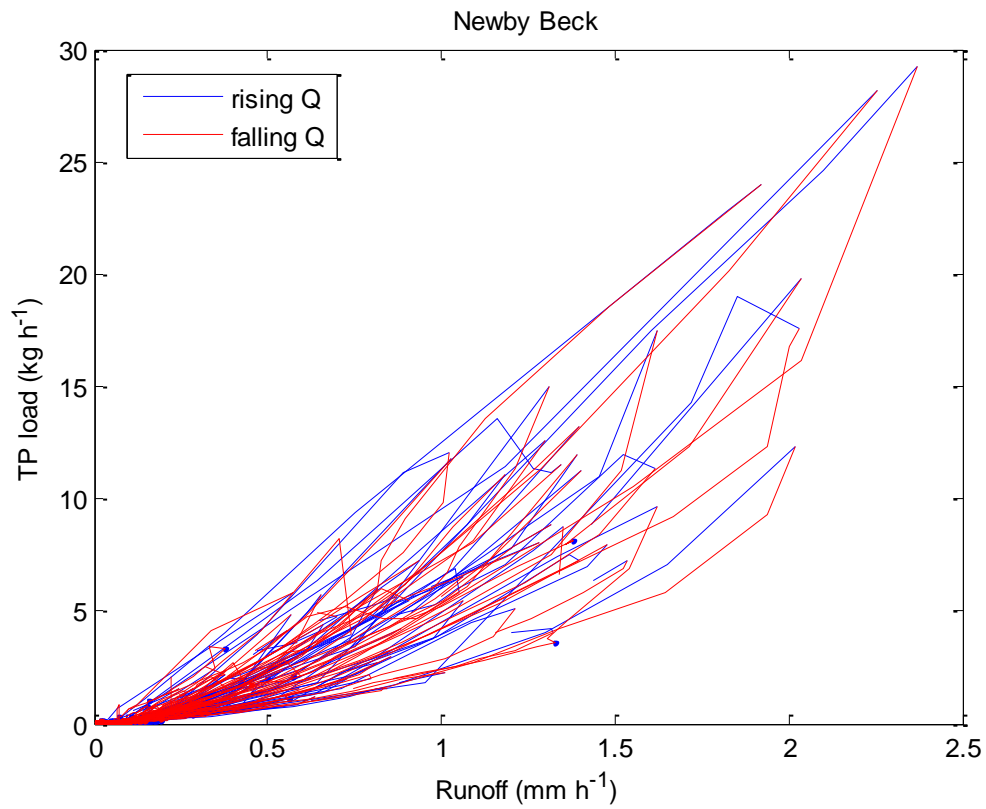

Figure S5

Hourly streamflow (Q) against total phosphorus (TP) load for the Blackwater catchment, with the rising limb of storm hydrographs in blue and the falling limb of hydrographs in red.

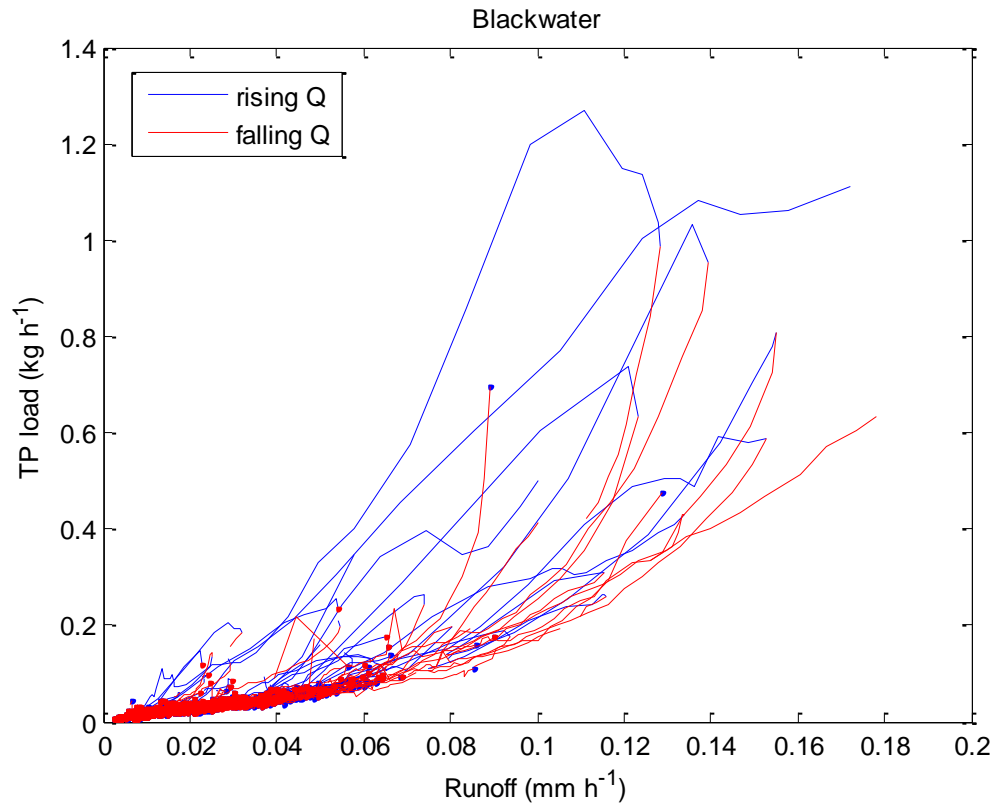

Figure S6

Hourly streamflow (Q) against total phosphorus (TP) load for the Wylie catchment, with the rising limb of storm hydrographs in blue and the falling limb of hydrographs in red.

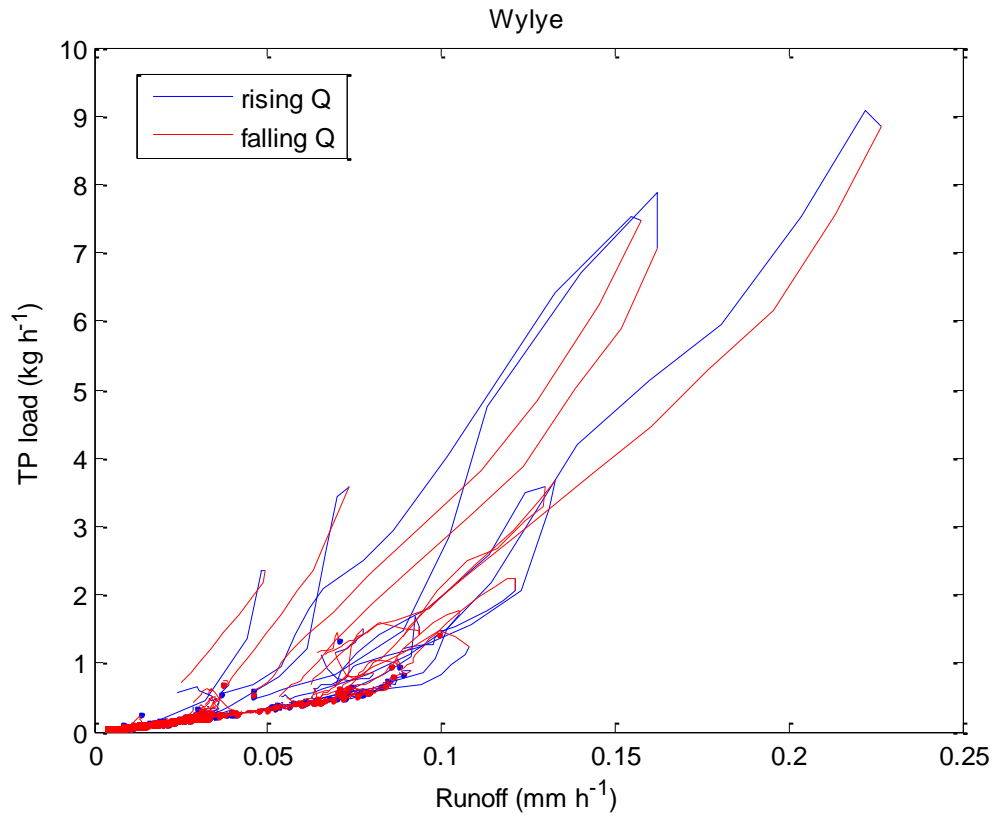



Figure S7

Time series of residuals and histogram of residuals for Figure 3

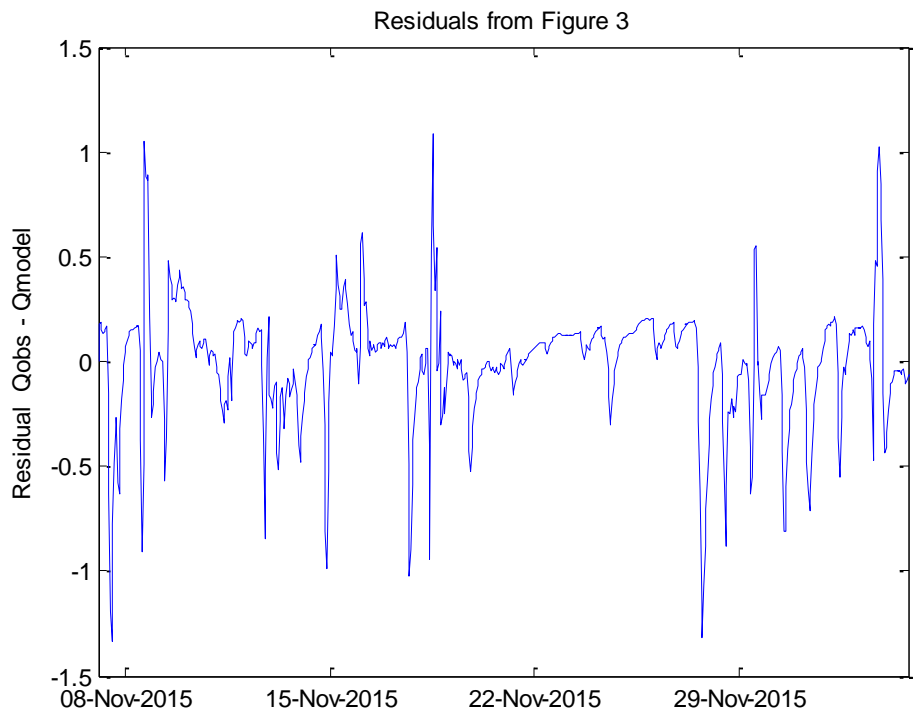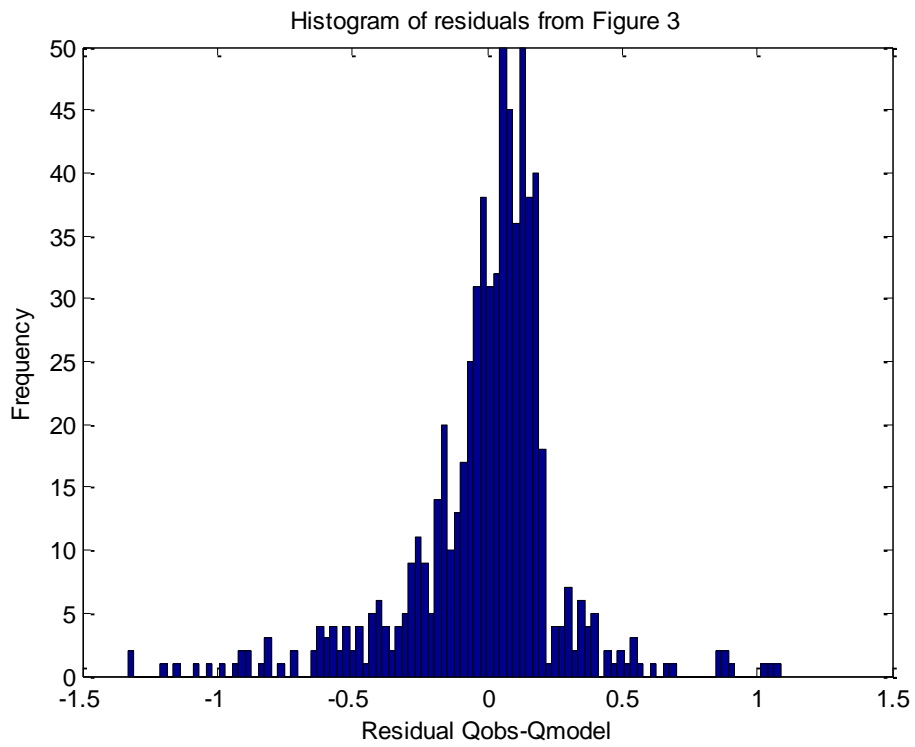

Figure S8

Time series of residuals and histogram of residuals for Figure 4

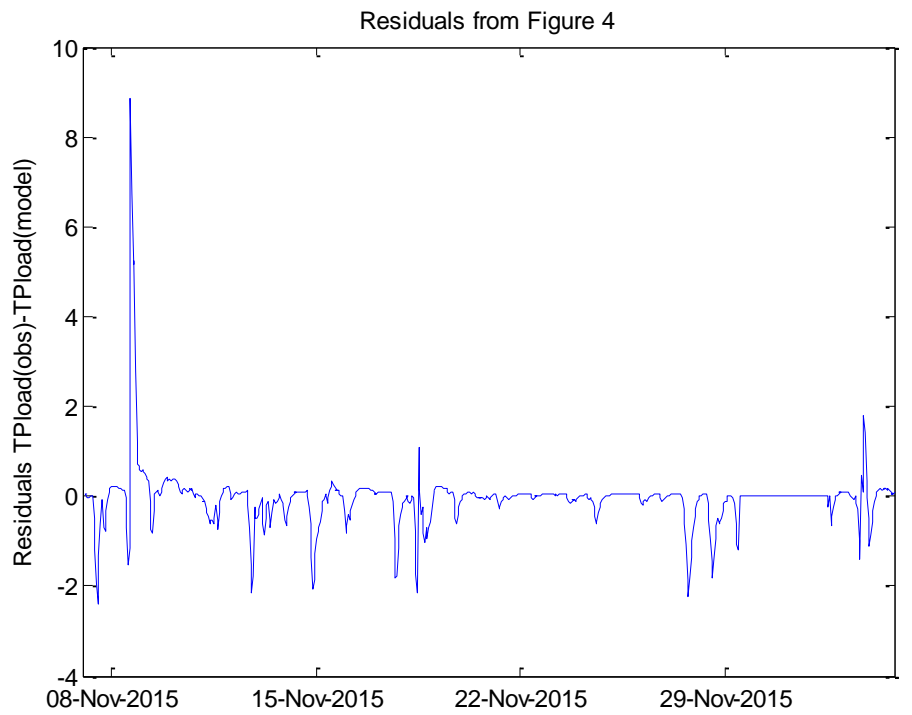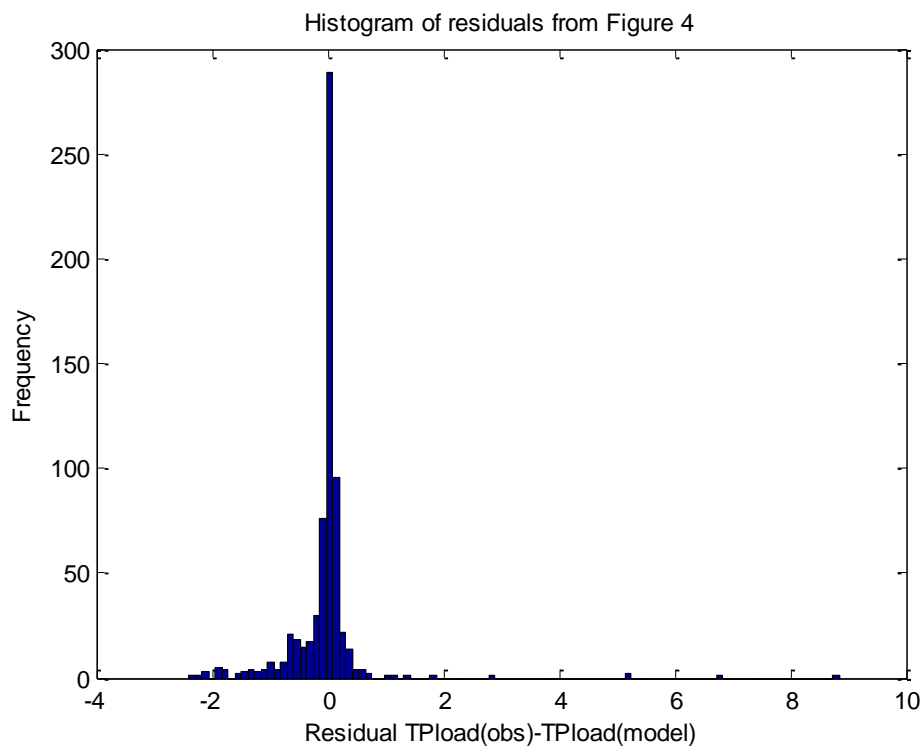

Figure S9

Discharge model, Newby Beck: Time series of residuals (top); residuals against discharge per unit area (bottom)

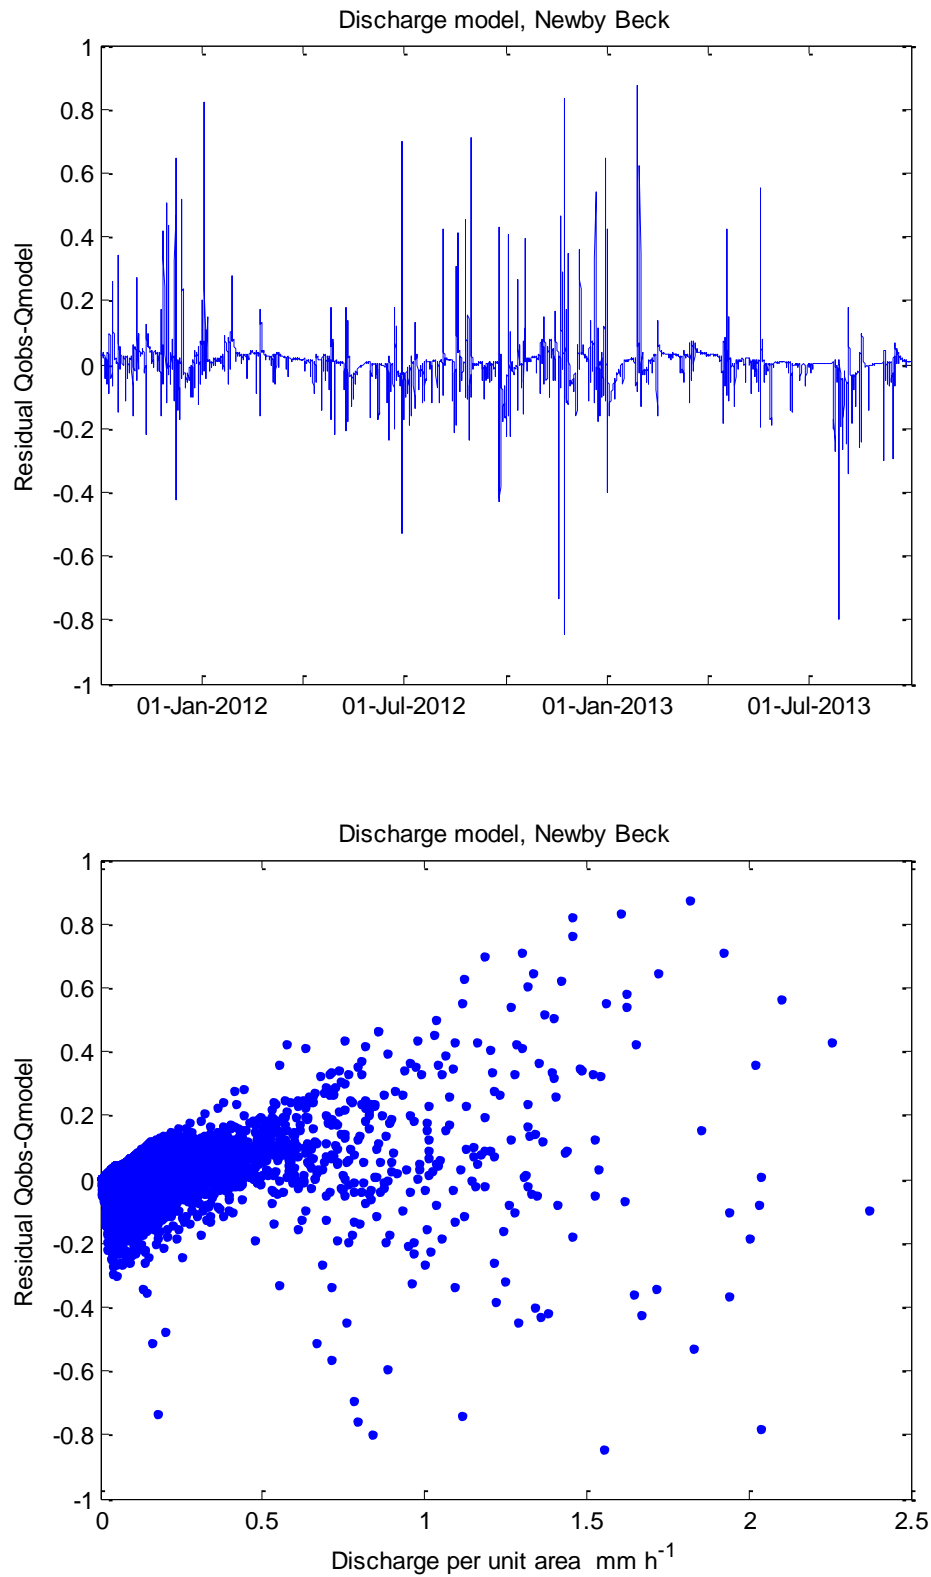

Figure S10

TP load model, Newby Beck: Time series of residuals (top); residuals against TP load (bottom)

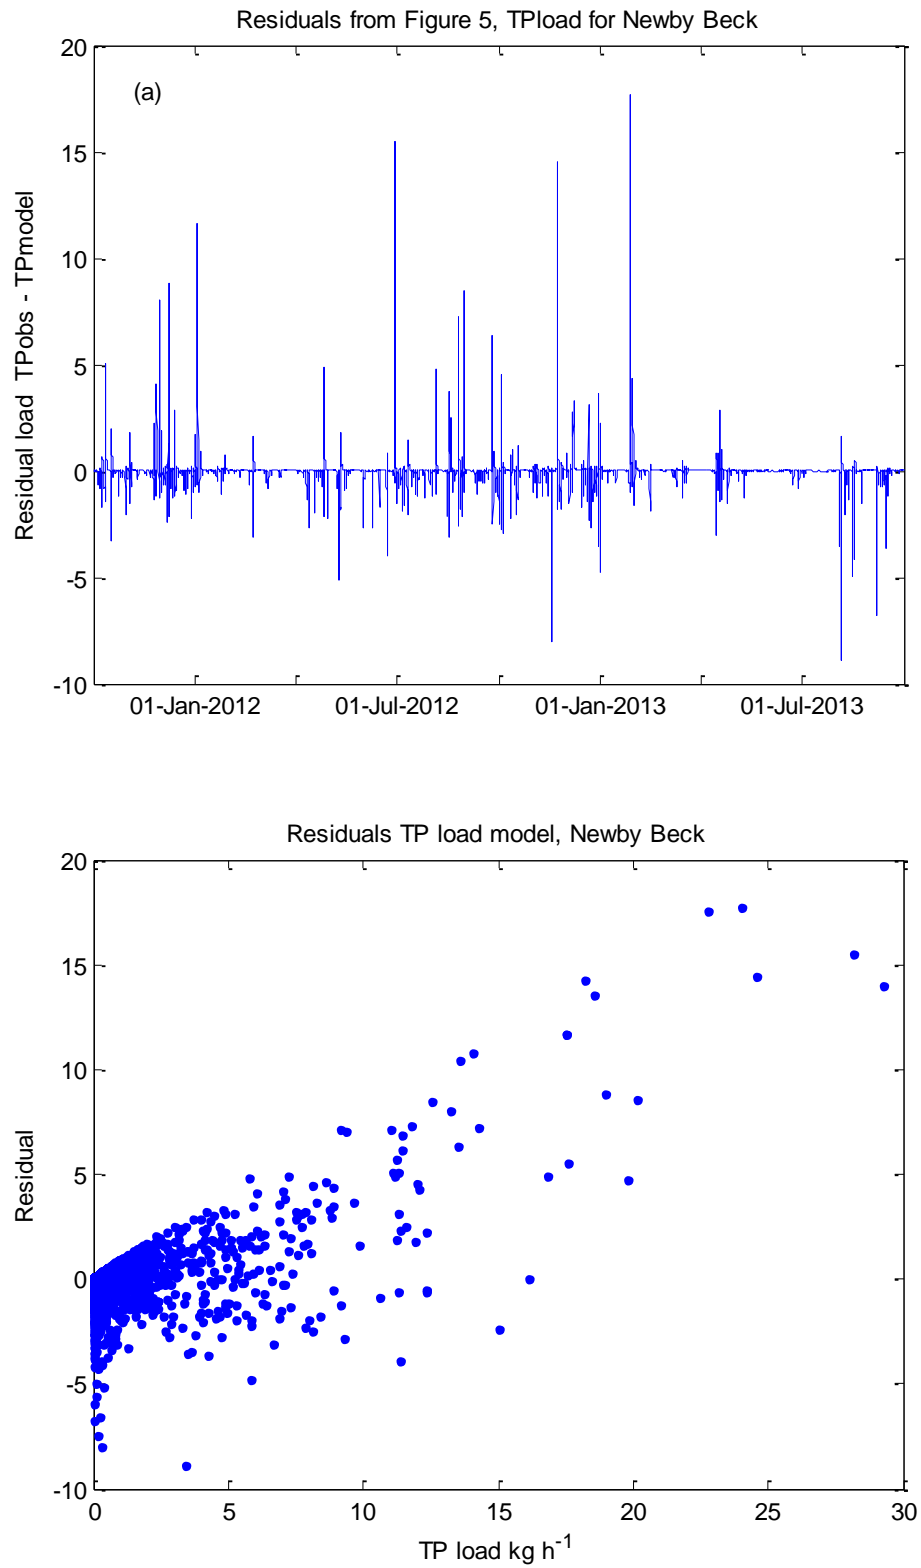

Figure S11

Discharge model, Wylze: Time series of residuals (top); residuals against discharge per unit area (bottom)

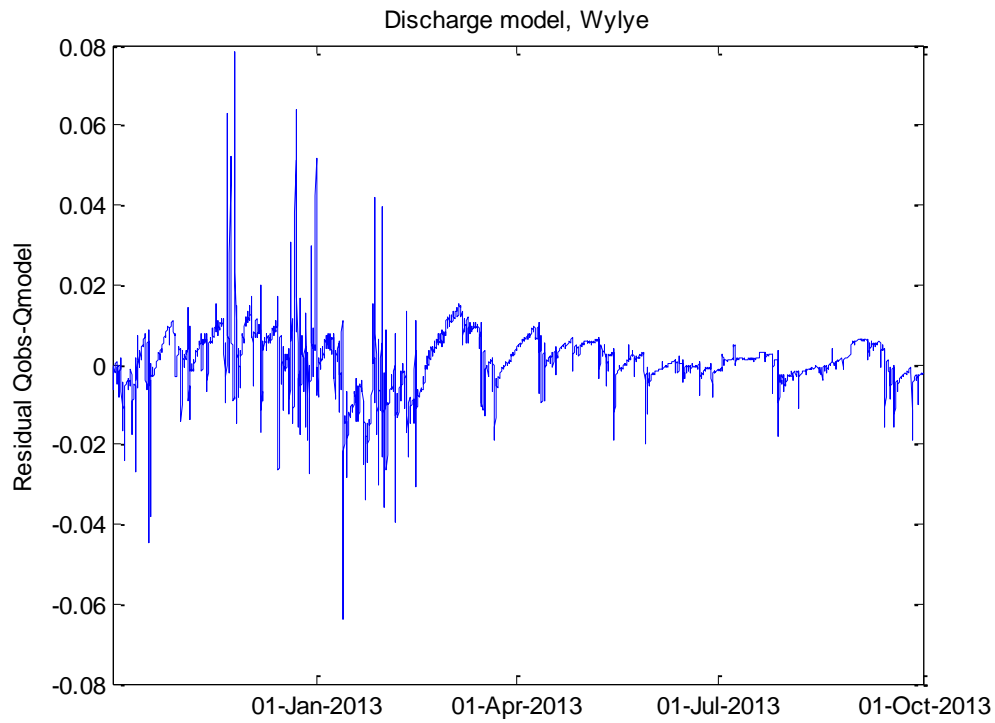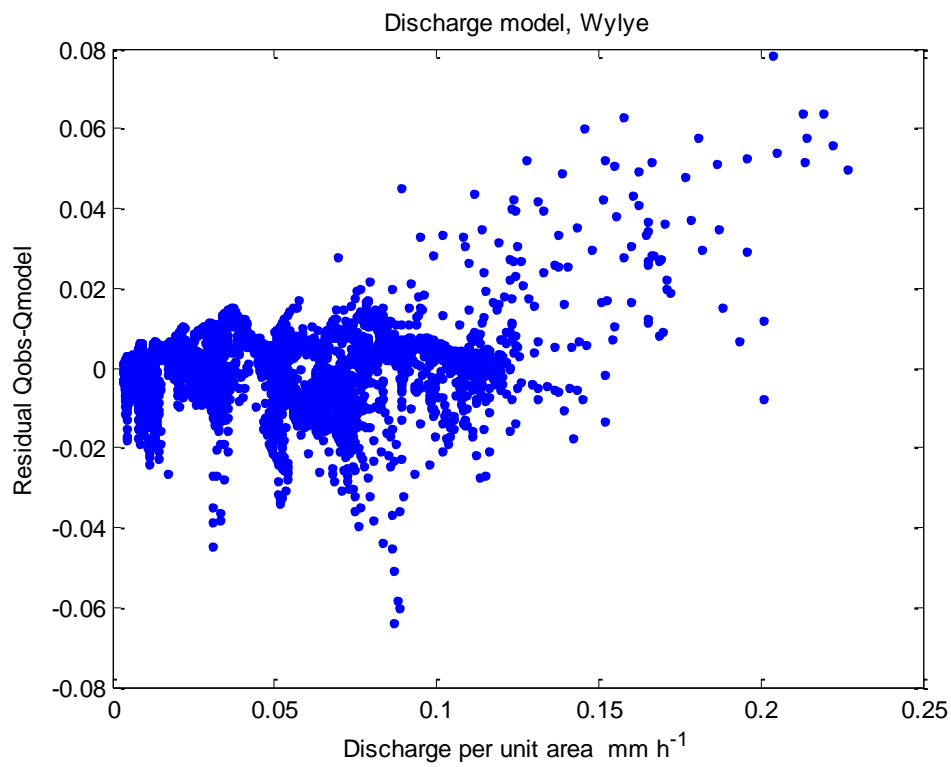

Figure S12

TP load model, Wylve: Time series of residuals (top) residuals against TP load (bottom)

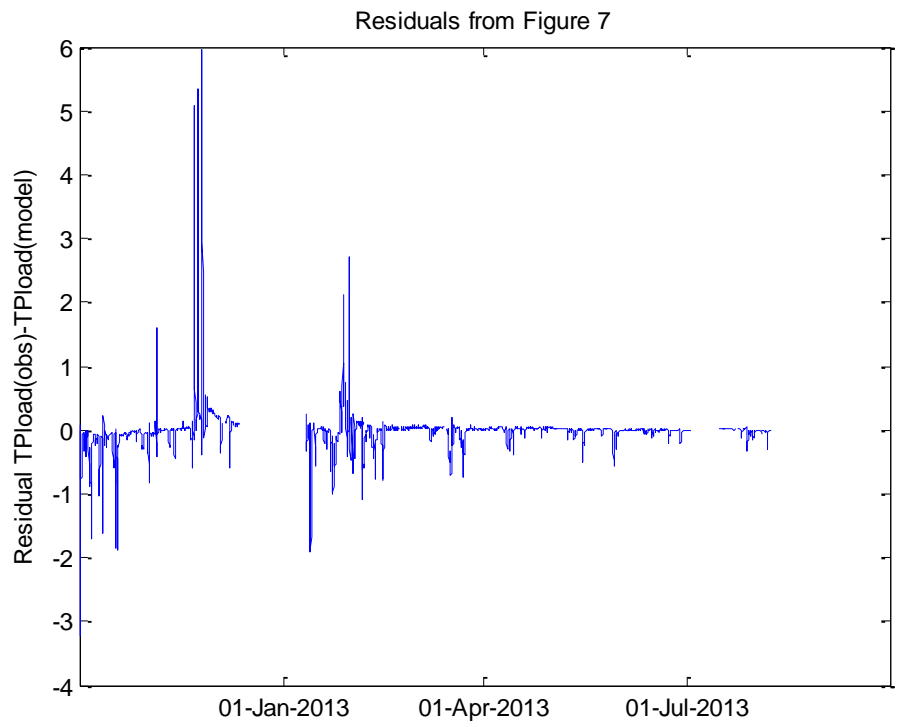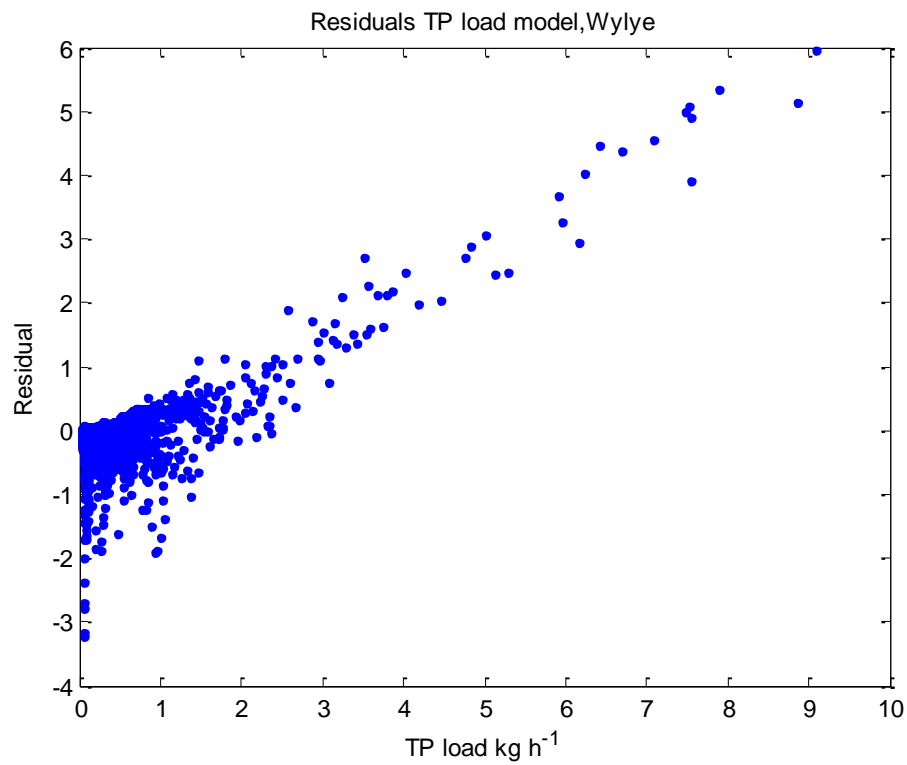

Figure S13

Discharge model, Blackwater: Time series of residuals (top); residuals against discharge per unit area (bottom)

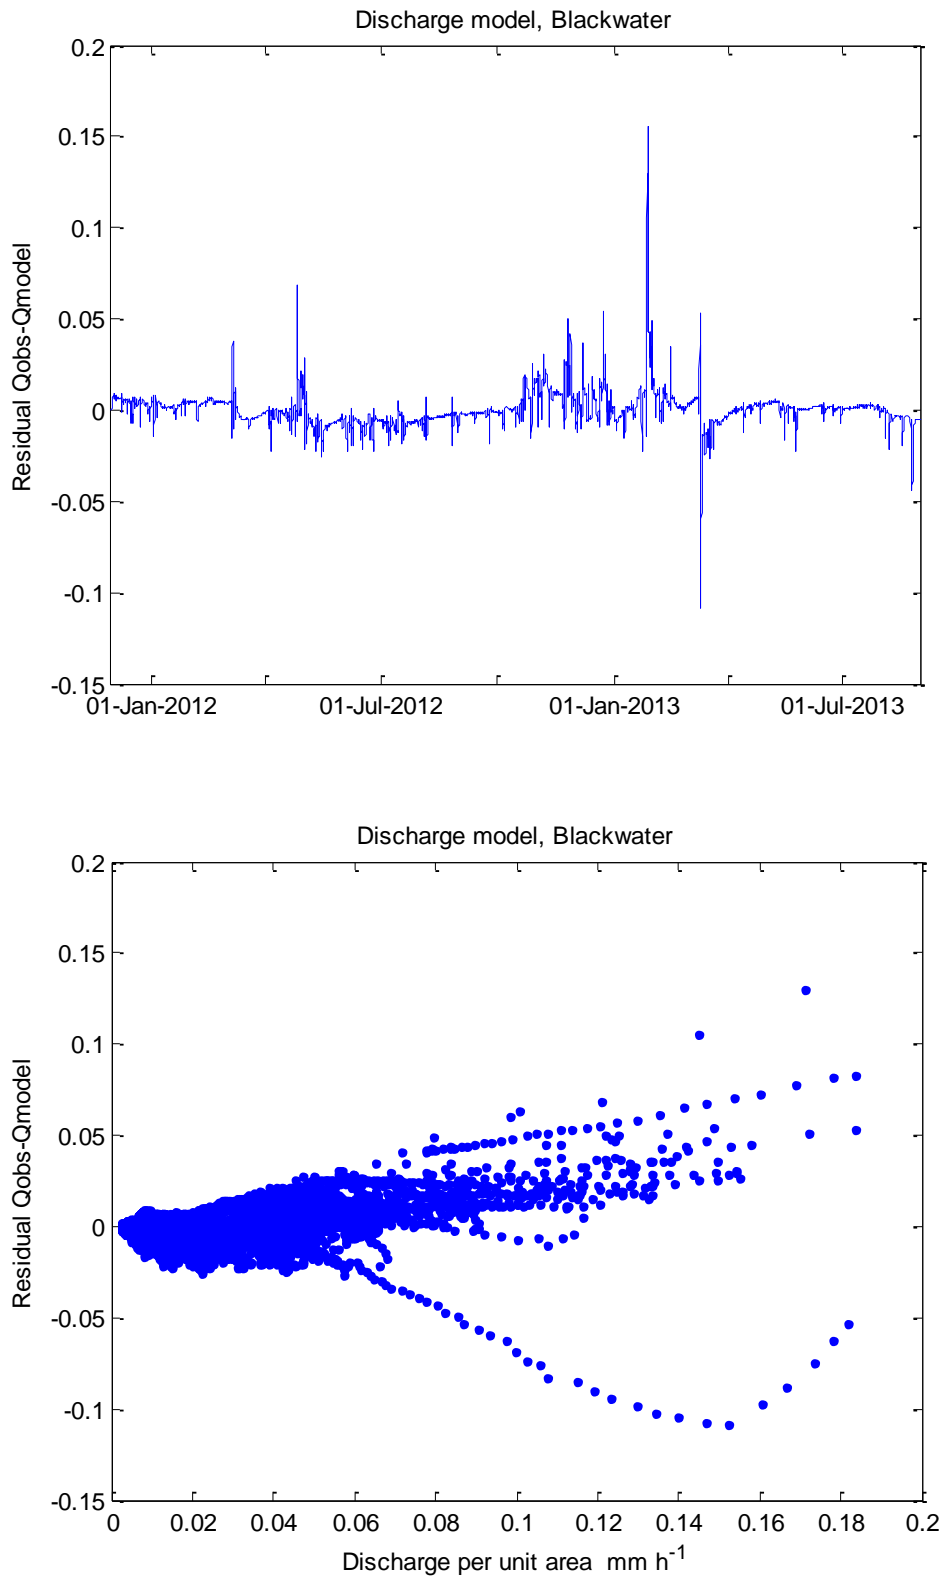

Figure S14

TP load model, Blackwater: Time series of residuals (top); residuals against TP load (bottom)

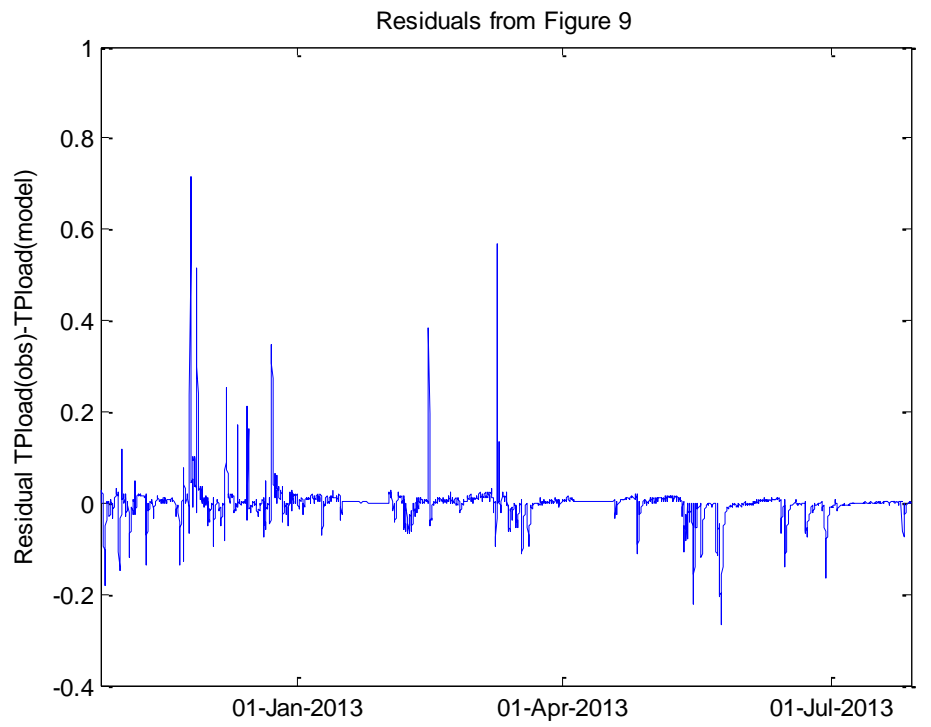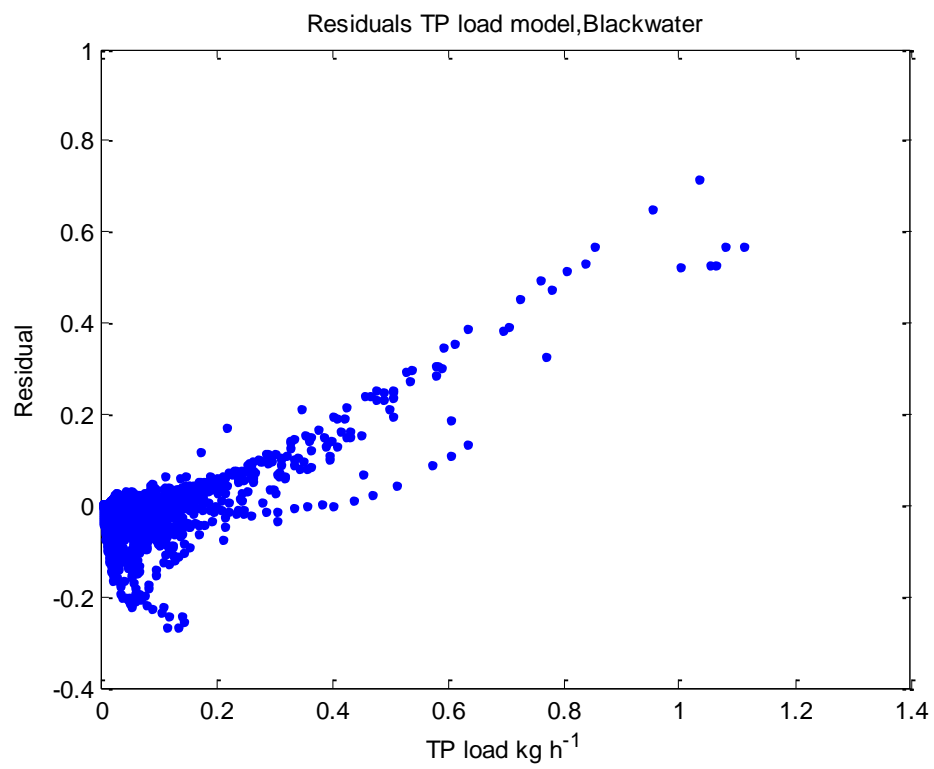



Figure S15

Discharge model (a) and TP load model (b) for validation period, Newby Beck

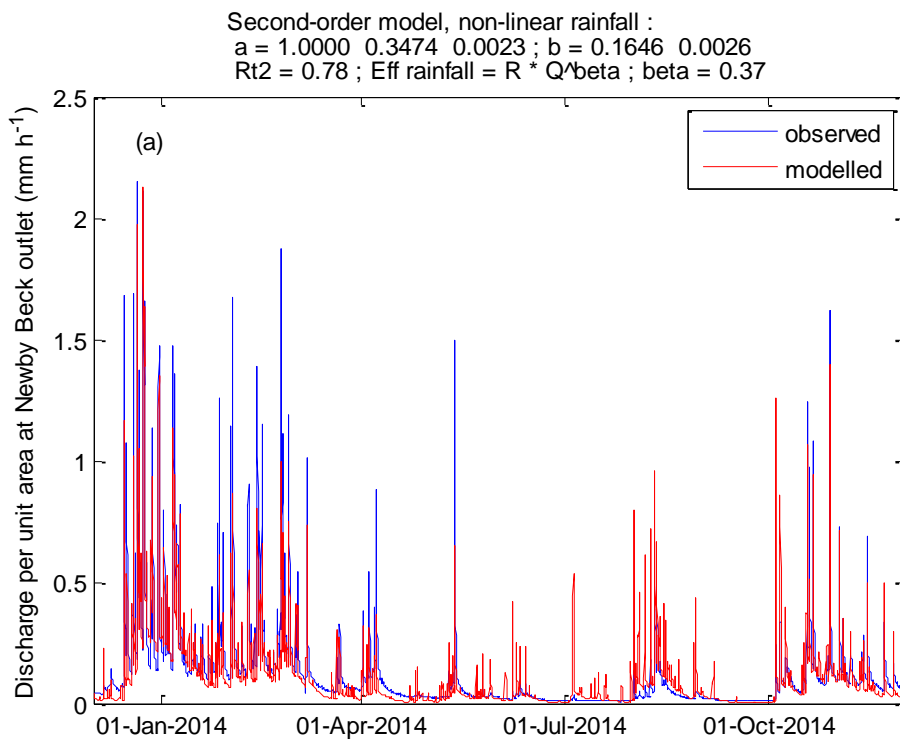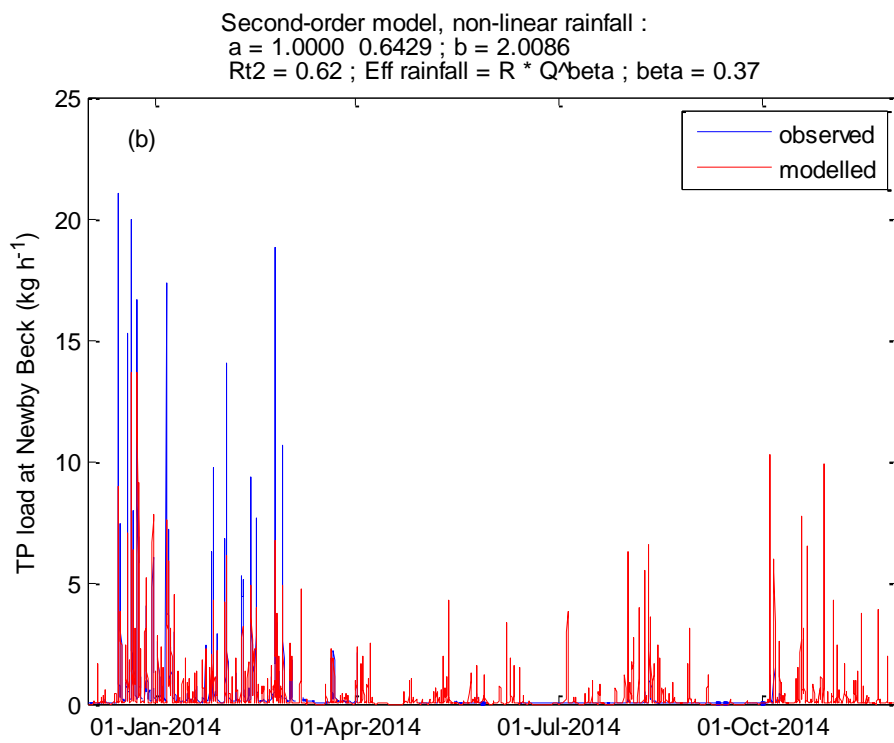

Figure S16

Discharge model (a) and TP load model (b) for validation period, Wylie

Second-order discrete-time model, non-linear rainfall :  
 $a = 1.0000 \ -1.7785 \ 0.7791$  ;  $b = 0.0000 \ 0.0000 \ 0.0000 \ 0.0000 \ 0.0000 \ 0.0000 \ 0.0440 \ -0.042$   
 $Rt2 = 0.79$  ; Eff rainfall =  $R * Q^{beta}$  ;  $beta = 0.59$

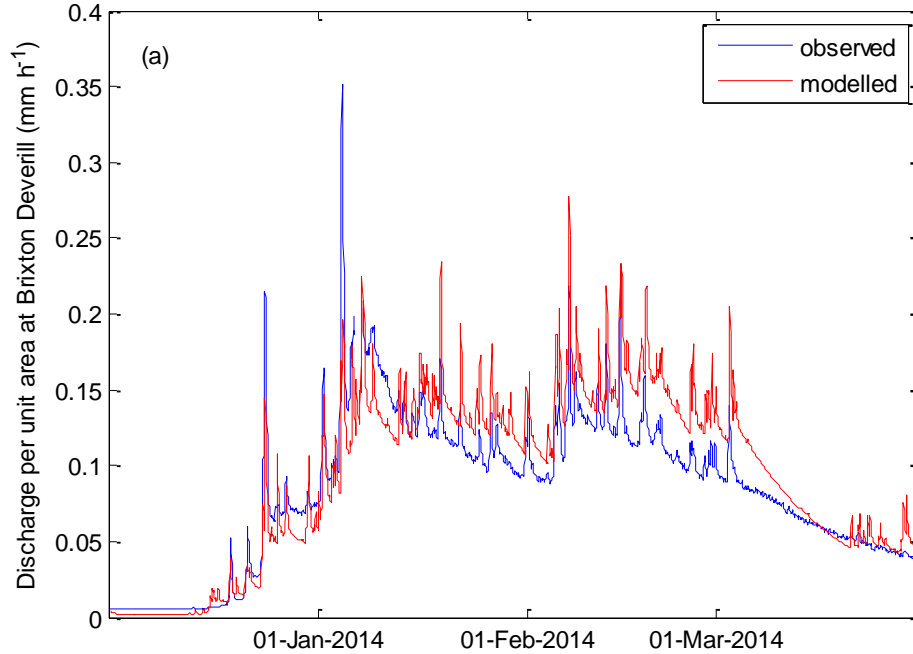

Second-order model, non-linear rainfall :  
 $a = 1.0000 \ 0.1660 \ 0.0003$  ;  $b = 1.3016 \ 0.0054$   
 $Rt2 = 0.50$  ; Eff rainfall =  $R * Q^{beta}$  ;  $beta = 0.59$

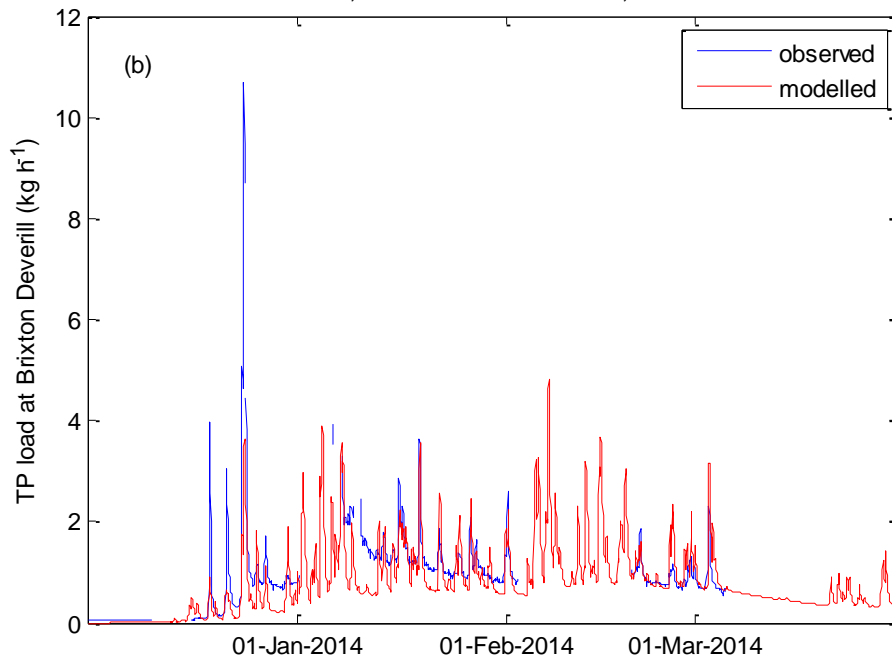

Figure S17

Discharge model for calibration period, Blackwater, where effective rainfall has been generated using Qobs (observations) (a) and using Qsim (simulation) (b), showing the poor fit which made Qsim unusable in the TPLoad model.

Second-order discrete-time model, non-linear rainfall using Qobs :

$a = 1.0000 \ -1.9324 \ 0.9325$  ;  $b = 0.0000 \ 0.0000 \ 0.0000 \ 0.0000 \ 0.0000 \ 0.0000 \ 0.0526 \ -0.052$   
 $Rt2 = 0.82$  ; Eff rainfall =  $R * Q^{beta}$  ;  $beta = 0.65$

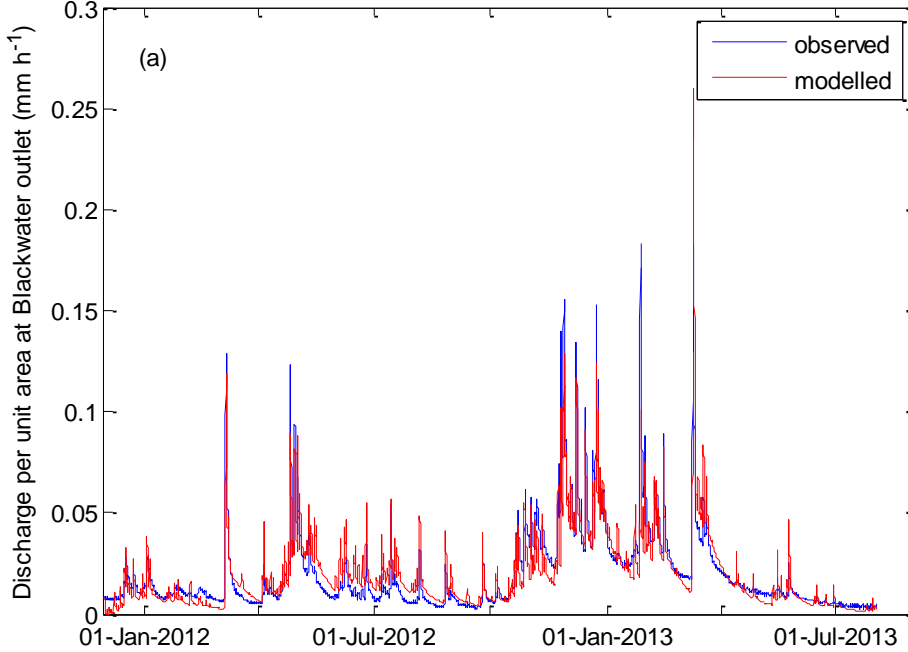

Second-order discrete-time model, non-linear rainfall using Qsim:

$a = 1.0000 \ -1.9324 \ 0.9325$  ;  $b = 0.0000 \ 0.0000 \ 0.0000 \ 0.0000 \ 0.0000 \ 0.0000 \ 0.0526 \ -0.052$   
 $Rt2 = 0.37$  ; Eff rainfall =  $R * Q^{beta}$  ;  $beta = 0.65$

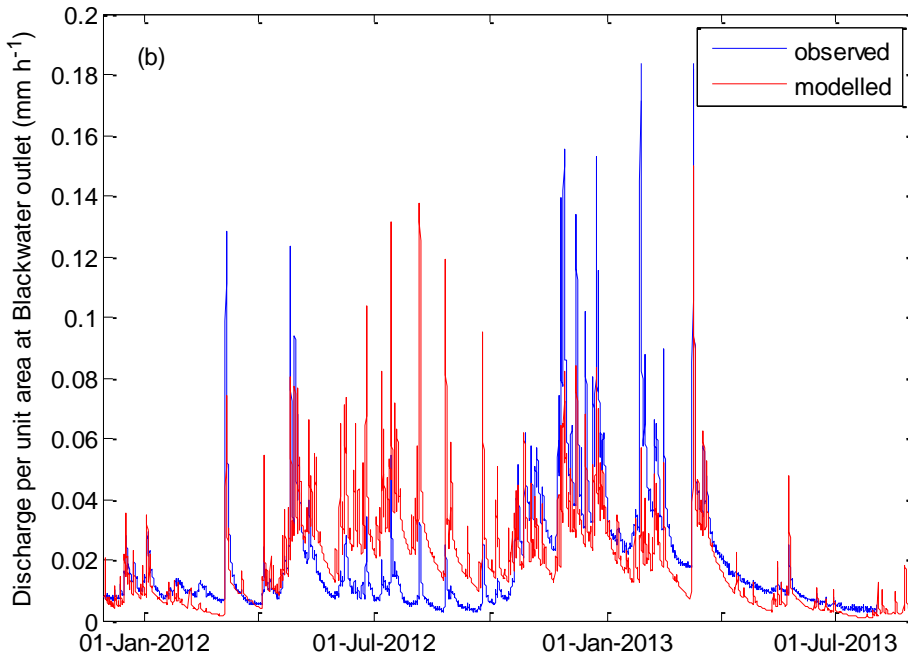

Figure S18

Discharge model (a) for validation period, Blackwater, showing poor fit which made effective rainfall unsuitable for use in the TP model; and TP model (b) for validation period using linear rainfall input

Second-order discrete-time model,

$a = 1.0000 \ -1.9324 \ 0.9325$ ;  $b = 0.0000 \ 0.0000 \ 0.0000 \ 0.0000 \ 0.0000 \ 0.0000 \ 0.0526 \ -0.052$

$Rt2 = 0.32$

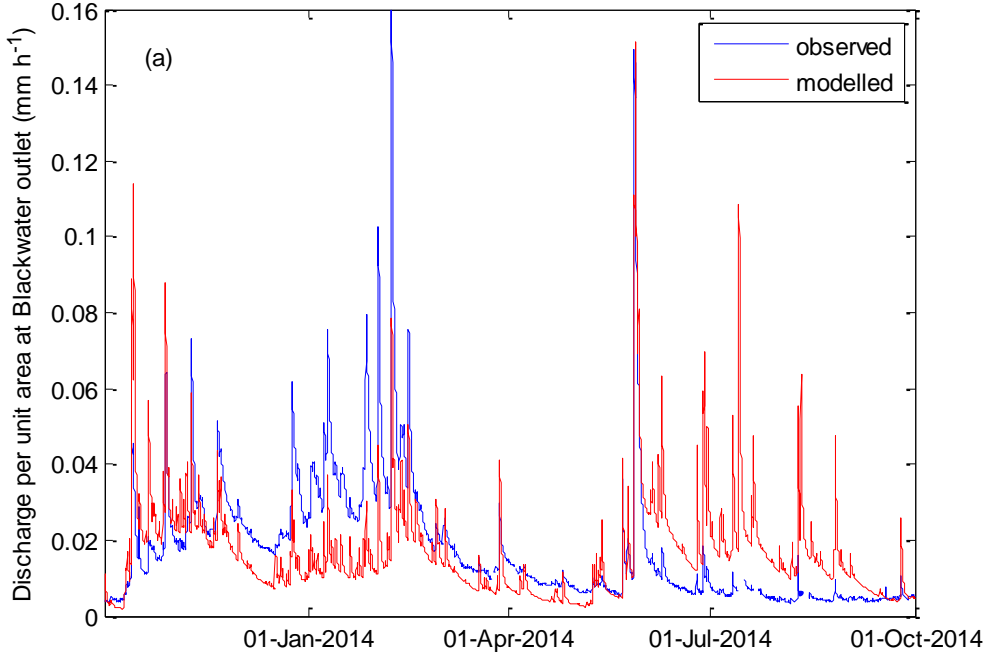

Second-order model, linear rainfall :

$a = 1.0000 \ 0.0826 \ 0.0002$ ;  $b = 0.0335 \ 0.0002$

$Rt2 = 0.31$

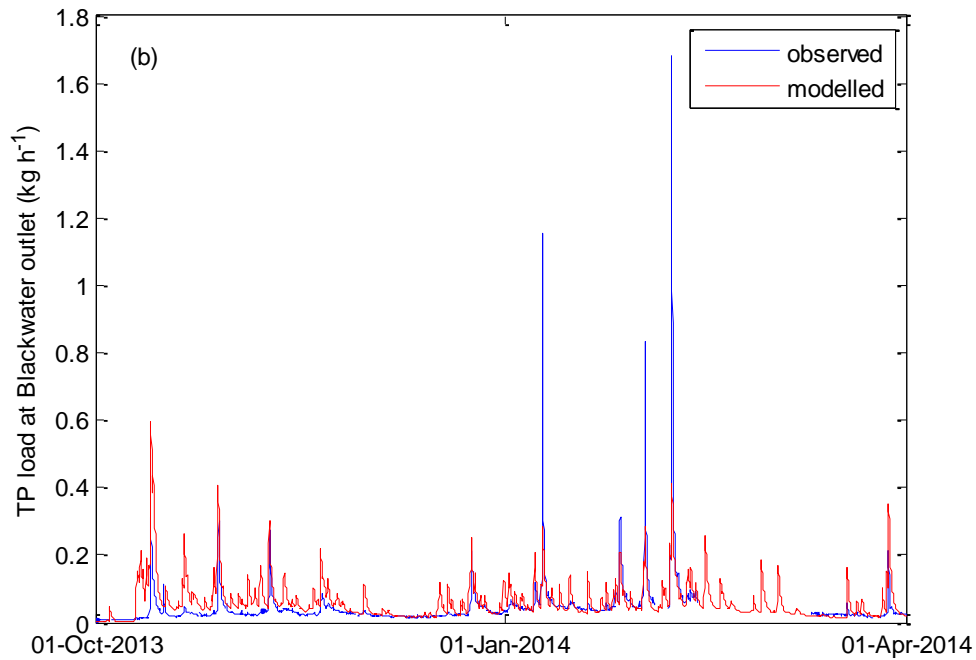

## Supplementary references

Franklin, G. F., Powell, J. D., and Emami-Naeini, A.: Feedback Control of Dynamic Systems, 4th Edition, Prentice-Hall, 2002.

UKCP09: Gridded observation data sets:

<http://www.metoffice.gov.uk/climatechange/science/monitoring/ukcp09/> access: 18 August 2015, 2009.

Ockenden, M. C., Hollaway, M. J., Beven, K., Collins, A. L., Evans, R., Falloon, P., Forber, K. J., Hiscock, K. M., Kahana, R., Macleod, C. J. A., Tych, W., Villamizar, M. L., Wearing, C., Withers, P. J. A., Zhou, J. G., Barker, P. A., Burke, S., Freer, J. E., Johnes, P., Snell, M. A., Surridge, B. W. J., and Haygarth, P. M.: Major agricultural changes required to mitigate phosphorus losses under climate change, *Nat Commun*, 10.1038/s41467-017-00232-0, 2017.

Robson, A., and Reed, D.: Flood Estimation Handbook - FEH CD-ROM 3, Institute of Hydrology, Wallingford, 1999.

Soil Survey of England and Wales: Legend for the 1:250,000 Soil Map of England and Wales, Soil Survey of England and Wales, Rothamsted Experimental Station, Harpenden, 1983.

Young, P. C.: Recursive Estimation and Time-Series Analysis, Springer-Verlag, Berlin, 1984.
